# Supplementary material for: DNA methylation and human disease
Source: Springer Nature journal article supplement (doi:10.1038/nrg1655), 2005-08-01
Supplement: 41576_2005_BFnrg1655_MOESM1_ESM.pdf [file 41576_2005_BFnrg1655_MOESM1_ESM.pdf]

**S1 | The mammalian DNA methylation machinery.** The mammalian DNA methylation machinery is a two-component system. DNA methyltransferases establish and maintain methylation marks, while methyl-CpG binding proteins interpret these marks.

| DNA methyltransferase      | Function                                                                                                                     | Localization                                       | Activity                                        |
|----------------------------|------------------------------------------------------------------------------------------------------------------------------|----------------------------------------------------|-------------------------------------------------|
| DNMT1                      | Maintenance of methylation, repression of transcription <sup>1-3</sup>                                                       | Replication foci in S-phase <sup>4</sup>           | Preference for hemi-methylated DNA <sup>5</sup> |
| DNMT2                      | Unknown                                                                                                                      | Nuclear, not well characterized                    | Low activity <i>in vitro</i> <sup>6</sup>       |
| DNMT3A                     | Methylation remodeling during embryogenesis, imprint establishment <sup>7</sup> , repression <sup>8</sup>                    | Heterochromatin and nucleoplasm <sup>8</sup>       | <i>De novo</i> methylation <sup>5</sup>         |
| DNMT3B                     | Methylation remodeling during embryogenesis, repeat methylation <sup>9</sup> , repression <sup>8</sup>                       | Heterochromatin and nucleoplasm <sup>8,10</sup>    | <i>De novo</i> and maintenance methylation      |
| DNMT3L                     | Methylation remodeling during embryogenesis, imprint establishment, spermatogenesis <sup>11</sup> , repression <sup>12</sup> | Heterochromatin and nucleoplasm                    | Not an active enzyme                            |
| Methyl-CpG binding protein | Function                                                                                                                     | Repression mediated by:                            | Binding Specificity                             |
| MeCP2                      | Transcriptional repression                                                                                                   | SIN3A, HDAC complex <sup>13,14</sup>               | Single symmetrically methylated CpGs            |
| MBD1                       | Transcriptional repression                                                                                                   | Partially HDAC-dependent repression <sup>15</sup>  | Methylated and unmethylated DNA                 |
| MBD2                       | Transcriptional repression                                                                                                   | MeCP1 chromatin remodeling complex <sup>16</sup>   | Methylated DNA                                  |
| MBD3                       | Transcriptional repression                                                                                                   | NuRD chromatin remodeling complex <sup>17,18</sup> | Unmethylated DNA                                |
| MBD4                       | DNA repair, glycosylase domain, repair of deaminated 5-methyl C <sup>19</sup>                                                | NA                                                 | <sup>5</sup> -methyl CpG/TpG mismatches         |

#### References:

1. Fuks, F., Bergers, W.A., Brehm, A., Hughes-Davies, L. & Kouzarides, T. DNA methyltransferase Dnmt1 associates with histone deacetylase activity. *Nature Genet.* **24**, 88-91 (2000).
2. Rountree, M.R., Bachman, K.E. & Baylin, S.B. DNMT1 binds HDAC2 and a new co-repressor, DMAP1, to form a complex at replication foci. *Nature Genet.* **25**, 269-277 (2000).
3. Robertson, K.D. et al. DNMT1 forms a complex with Rb, E2F1, and HDAC1 and represses transcription from E2F-responsive promoters. *Nature Genet.* **25**, 338-342 (2000).
4. Leonhardt, H., Page, A.W., Weier, H. & Bestor, T.H. A targeting sequence directs DNA methyltransferase to sites of DNA replication in mammalian nuclei. *Cell* **71**, 865-873 (1992).
5. Yokochi, T. & Robertson, K.D. Preferential methylation of unmethylated DNA by mammalian *de novo* DNA methyltransferase Dnmt3a. *J. Biol. Chem.* **277**, 11735-11745 (2002).

6. Hermann, A., Schmitt, S. & Jeltsch, A. The human Dnmt2 has residual DNA-(cytosine-C5) methyltransferase activity. *J. Biol. Chem.* **278**, 31717-31721 (2003).
7. Li, E. Chromatin modification and epigenetic reprogramming in mammalian development. *Nature Rev. Genet.* **3**, 662-673 (2002).
8. Bachman, K.E., Rountree, M.R. & Baylin, S.B. Dnmt3a and Dnmt3b are transcriptional repressors that exhibit unique localization properties to heterochromatin. *J. Biol. Chem.* **276**, 32282-32287 (2001).
9. Okano, M., Bell, D.W., Haber, D.A. & Li, E. DNA methyltransferases *Dnmt3a* and *Dnmt3b* are essential for de novo methylation and mammalian development. *Cell* **99**, 247-257 (1999).
10. Geiman, T.M. et al. Isolation and characterization of a novel DNA methyltransferase complex linking DNMT3B with components of the mitotic chromosome condensation machinery. *Nucleic Acids Res.* **32**, 2716-2729 (2004).
11. Bourc'his, D., Xu, G.-L., Lin, C.-S., Bollman, B. & Bestor, T.H. Dnmt3L and the establishment of maternal genomic imprints. *Science* **294**, 2536-2539 (2001).
12. Deplus, R. et al. Dnmt3L is a transcriptional repressor that recruits histone deacetylase. *Nucleic Acids Res.* **30**, 3831-3838 (2002).
13. Nan, X. et al. Transcriptional repression by the methyl-CpG-binding protein MeCP2 involves a histone deacetylase complex. *Nature* **393**, 386-389 (1998).
14. Jones, P.L. et al. Methylated DNA and MeCP2 recruit histone deacetylase to repress transcription. *Nature Genet.* **19**, 187-191 (1998).
15. Ng, H.-H., Jeppesen, P. & Bird, A. Active repression of methylated genes by the chromosomal protein MBD1. *Mol. Cell. Biol.* **20**, 1394-1406 (2000).
16. Feng, Q. & Zhang, Y. The MeCP1 complex represses transcription through preferential binding, remodeling, and deacetylating methylated nucleosomes. *Genes. Dev.* **15**, 827-832 (2001).
17. Wade, P.A. et al. The Mi-2 complex couples DNA methylation to chromatin remodeling and histone deacetylation. *Nature Genet.* **23**, 62-66 (1999).
18. Zhang, Y. et al. Analysis of the NuRD subunits reveals a histone deacetylase core complex and a connection with DNA methylation. *Genes. Dev.* **13**, 1924-1935 (1999).
19. Hendrich, B., Hardeland, U., Ng, H.-H., Jiricny, J. & Bird, A. The thymine glycosylase MBD4 can bind to the product of deamination at methylated CpG sites. *Nature* **401**, 301-303 (1999).
